# Supplementary material for: A novel potential mechanism for the development of portal vein thrombosis in cirrhosis based on portal hemodynamics
Source: PubMed Central journal article supplement (PMC9748017; doi:10.1186/s13244-022-01330-4), 2022-12-13
Supplement: 13244_2022_1330_MOESM1_ESM.pdf [file 13244_2022_1330_MOESM1_ESM.pdf]

## **ELECTRONIC SUPPLEMENTARY MATERIAL**

### **A novel potential mechanism for the development of portal vein thrombosis in cirrhosis based on portal hemodynamics**

**Table S1. The hemodynamic parameters in the PV.**

| $\alpha$           | $h_2$<br>( $m/s^2$ ) | $V_{MEAN}$<br>(m/s) | $V_{MAX}$<br>(m/s) | P<br>(mmHg) | $FR_{RPV}$<br>(ml/s) | $FR_{LPV}$<br>(ml/s) | AWSS<br>(pa) |
|--------------------|----------------------|---------------------|--------------------|-------------|----------------------|----------------------|--------------|
| $\alpha=80^\circ$  | 12.6                 | 0.23                | 0.46               | 10.25       | 14.38                | 6.62                 | 1.61         |
| $\alpha=90^\circ$  | 17.1                 | 0.23                | 0.45               | 10.24       | 14.46                | 6.53                 | 1.64         |
| $\alpha=100^\circ$ | 21.4                 | 0.23                | 0.44               | 10.22       | 14.29                | 6.68                 | 1.74         |
| $\alpha=110^\circ$ | 25.6                 | 0.23                | 0.44               | 10.25       | 14.21                | 6.77                 | 1.76         |
| $\alpha=120^\circ$ | 29.3                 | 0.23                | 0.45               | 10.24       | 14.33                | 6.76                 | 1.79         |

$\alpha$ , the angle of SMV and SV;  $h_2$ , helical strength;  $V_{MEAN}$ , average blood velocity;  $V_{MAX}$ , maximum blood velocity; P, pressure;  $FR_{LPV}$ , LPV flow rate;  $FR_{RPV}$ , RPV flow rate; AWSS, area-average wall shear stress.

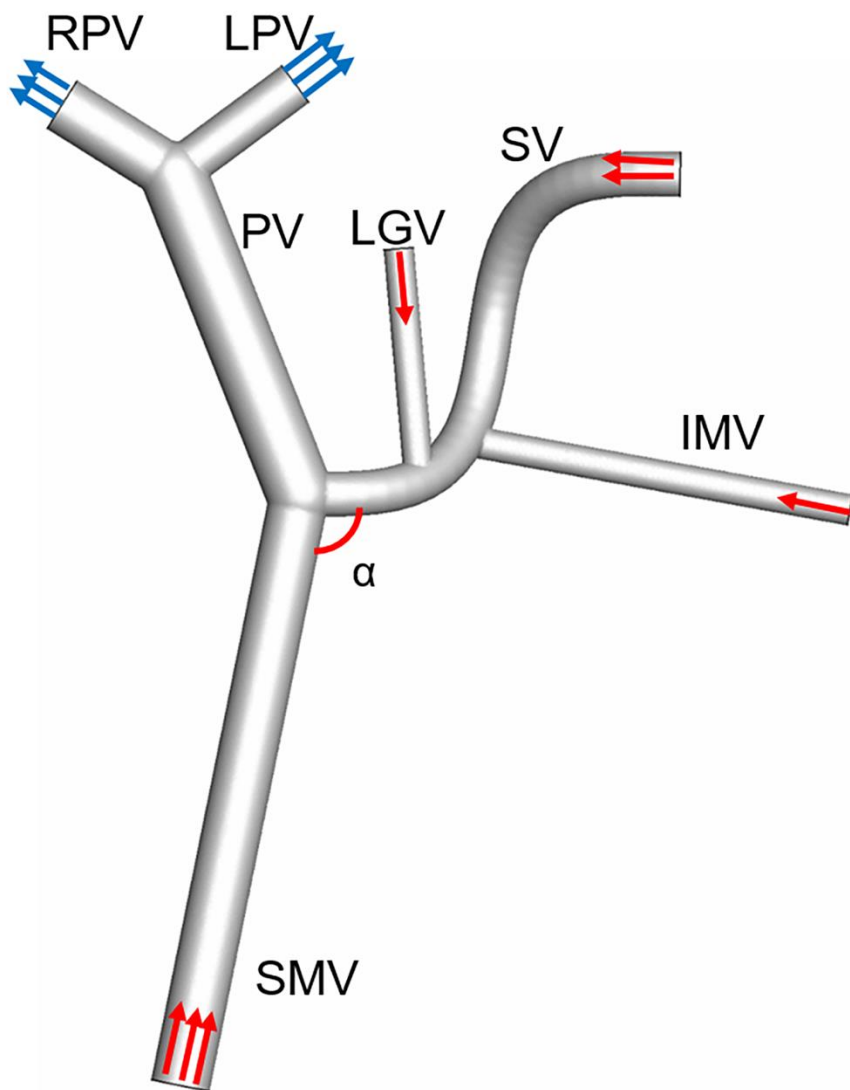

**Figure S1. Illustration of the ideal portal system; LGV, left gastric vein; IMV, inferior mesenteric vein.**

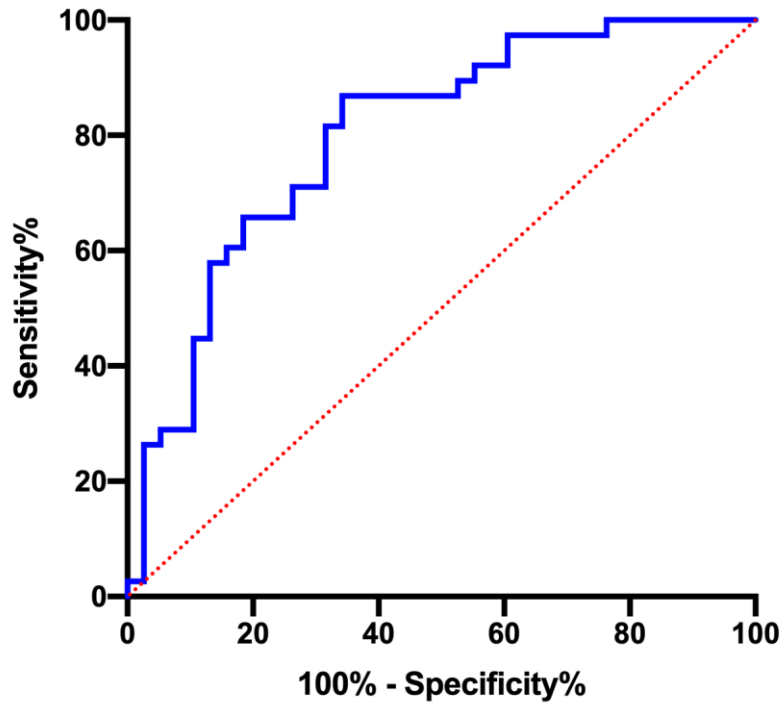

Figure S2. The receiving operating characteristic curve of angulation of SMV and SV for predicting PVT.
